# Supplementary material for: How many symmetry operations are needed to generate a space group?
Source: publisher site journal article supplement (doi:10.1515/zkri-2024-0110), 2025-01-01
Supplement: Supplementary file 2 [file j_zkri-2024-0110_suppl_001.docx]

LoadPackage("cryst");

# Variable parameters
ScriptName               := "Generators";    # Script name
ScriptVersion            := "5.00";          # Script version

InfoGenerators           := true;            # Additional info messages
StopIfFirstSetFound      := true;            # Stop when first generator set will found
AddTGenerators           := true;            # Addinional axis T generators
AddTSGenerators          := true;            # Addinional T*S generators
AddSTGenerators          := false;           # Addinional S*T generators
AddGensOnlyForW0         := true;            # Addinional generators only if translation part is empty

RunOnlyOneGroup          := 5;               # Execute only one specified space group (0 for all groups)

# Output printed stdout text to the log file
LogTo("Generators_5.00.log");
SetPrintFormattingStatus("*stdout*", false);

# Determine variant is returned by the generic form
SetCrystGroupDefaultAction(LeftAction);

# General generators from International Tables of Crystallography (first 5 only)
genSource := [[], [[[-1, 0, 0, 0], [0, -1, 0, 0], [0, 0, -1, 0], [0, 0, 0, 1]]], [[[-1, 0, 0, 0], [0, 1, 0, 0], [0, 0, -1, 0], [0, 0, 0, 1]]], [[[-1, 0, 0, 0], [0, 1, 0, 1/2], [0, 0, -1, 0], [0, 0, 0, 1]]], [[[-1, 0, 0, 0], [0, 1, 0, 0], [0, 0, -1, 0], [0, 0, 0, 1]], [[1, 0, 0, 1/2], [0, 1, 0, 1/2], [0, 0, 1, 0], [0, 0, 0, 1]], [[-1, 0, 0, 1/2], [0, 1, 0, 1/2], [0, 0, -1, 0], [0, 0, 0, 1]]]];

# Translation generators along axis
axGens := [[[1, 0, 0, 1], [0, 1, 0, 0], [0, 0, 1, 0], [0, 0, 0, 1]], [[1, 0, 0, 0], [0, 1, 0, 1], [0, 0, 1, 0], [0, 0, 0, 1]], [[1, 0, 0, 0], [0, 1, 0, 0], [0, 0, 1, 1], [0, 0, 0, 1]]];

# Identical transformation
iGen := [[1, 0, 0, 0], [0, 1, 0, 0], [0, 0, 1, 0], [0, 0, 0, 1]];

# Define type of the generator
# Parametrs:
#	Gen - generator matrix
# Return:
#	One of three types: "Iw" - only translation, "W0" - only rotation, "Ww" - rotation and translation
TypeOfGenerator := function(Gen)

	local i, j, Type, isTranslation;
	
	Type := "";
	
	# Scan I matrix
	isTranslation := true;
	for j in [1..3] do
		for i in [1..3] do
			if not Gen[j][i] = iGen[j][i] then
				isTranslation := false;
				break;
			fi;
		od;
		if not isTranslation then
			break;
		fi;
	od;
	
	# Define Type
	if isTranslation then
		Type := "Iw";
	else
		if Gen[1][4]=0 and Gen[2][4]=0 and Gen[3][4]=0 then
			Type := "W0";
		else
			Type := "Ww";
		fi;
	fi;	
	
	return Type;
	
end;

# Scan all crystallographic space groups
if RunOnlyOneGroup > 0 then
	gRange := [RunOnlyOneGroup..RunOnlyOneGroup];
else
	gRange := [1..230];
fi;
for gNum in gRange do
	
	# Cycle time stump
	CycleTime := Runtime();

	# Separate pure translation from other symmetry operation
	trGens      := [];
	symGens     := [];
	symGensType := [];
	Print("№", gNum, " Starting generators set: ", + Size(genSource[gNum]), " pc\n");
	Print("№", gNum, " Generators separation: \n");
	for curGen in genSource[gNum] do
		GenType := TypeOfGenerator(curGen);
		if GenType = "Iw" then
			Add(trGens, curGen);
		else
			Add(symGens, curGen);
			Add(symGensType, GenType);
		fi;
		Print("№", gNum, "  ", GenType, " ", curGen, "\n");
	od;
	
	# Different variants of generators sets
	genSets := [];
	
	# Form generators pool to explore
	gGens     := [];
	gGenTypes := [];
	
	# First, take axis translation axGens if need
	if AddTGenerators then
		for i in [1..Size(axGens)] do
			Add(gGens, axGens[i]);
			Add(gGenTypes, "Iw");
		od;	
	fi;
	
	# Second, take pure translation trGens
	for i in [1..Size(trGens)] do
		Add(gGens, trGens[i]);
		Add(gGenTypes, "Iw");
	od;
	
	# Third, take simple generators from symGens (wihout translation part)
	for i in [1..Size(symGens)] do
		if symGensType[i] = "W0" then
			Add(gGens, symGens[i]);
			Add(gGenTypes, symGensType[i]);
		fi;
	od;
	
	# Firth, take complex generators from symGens (with translation part)
	for i in [1..Size(symGens)] do
		if symGensType[i] = "Ww" then
			Add(gGens, symGens[i]);
			Add(gGenTypes, symGensType[i]);
		fi;
	od;
	
	# Finaly, append additional generator as product symGens with translations
	newTS := 0; newST := 0;
	if AddTSGenerators or AddSTGenerators then
	
		# Form united translation generators set
		utrGens := ShallowCopy(axGens);
		Append(utrGens, trGens);

		Print("№", gNum, " Additional generators:\n");
		for utrGen in utrGens do
			for symGen in symGens do
				# If condition is satisfied add product with translation generator
				if not AddGensOnlyForW0 or AddGensOnlyForW0 and symGen[1][4]=0 and symGen[2][4]=0 and symGen[3][4]=0 then
					if InfoGenerators then
						Print("№", gNum, "  T   ", utrGen, "\n");
						Print("№", gNum, "  S   ", symGen, "\n");
					fi;
					# Additionaly take T*S product
					if AddTSGenerators then
						newGenTS := utrGen*symGen;
						if not newGenTS in gGens then
							Add(gGens, newGenTS);
							Add(gGenTypes, TypeOfGenerator(newGenTS));  
							Print("№", gNum, "  T*S ", newGenTS, " - new\n");
							newTS := newTS + 1;
						else
							if InfoGenerators then
								Print("№", gNum, "  T*S ", newGenTS, " - old\n");
							fi;
						fi;
					fi;
					
					# Additionaly take S*T product
					if AddSTGenerators then
						newGenST := symGen*utrGen;
						if not newGenST in gGens then
							Add(gGens, newGenST);
							Add(gGenTypes, TypeOfGenerator(newGenST));
							Print("№", gNum, "  S*T ", newGenST, " - new\n");
							newST := newST + 1;
						else
							if InfoGenerators then	
								Print("№", gNum, "  S*T ", newGenST, " - old\n");
							fi;
						fi;	
					fi;	
				fi;
			od;	
		od;	
		if InfoGenerators then
			Print("№", gNum, "  Added T*S ", newTS, " pc, S*T ", newST, " pc\n");
		fi;
	fi;
	
	# Total generators pool
	if InfoGenerators then
		Print("№", gNum, " Total generators pool (", Size(gGens), " pc):\n");
		for i in [1..Size(gGens)] do
			Print("№", gNum, "  ", gGenTypes[i], " gGens[", i, "]=", gGens[i], "\n");	
		od;
	fi;
	
	# Creat indexes for generators pool
	genIndexes := [];
	for i in [1..Size(gGens)] do
		Add(genIndexes, i);
	od;	
	
	# Creat space group by full generators pool
	g := AffineCrystGroupOnLeft(gGens);
	
	# Scan all different combinations of n generators. Looking for minimum generators set
	found := false;
	Print("№", gNum, " Scan generators pool:\n");
	for n in [2..6] do # Maximum n=6 for Pmmm
	
		# Stop looking for if found previous step
		if found then 
			break; 
		fi;
		
		# Time stump
		beginTime  := Runtime();
		
		# Scan all generators combinations
		scanCombs := 0;
		genIndexCombinations := Combinations(genIndexes, n);
		for j in [1..Size(genIndexCombinations)] do
			
			scanCombs := scanCombs + 1;
			
			# Form current set of generators
			curGens     := [];
			curGenTypes := [];
			for i in [1..Size(genIndexCombinations[j])] do
				Add(curGens,     gGens[genIndexCombinations[j][i]]);
				Add(curGenTypes, gGenTypes[genIndexCombinations[j][i]]);
			od;
			
			# If current generation set generates origin group g then save it
			if AffineCrystGroupOnLeft(curGens) = g then
				Add(genSets, curGens);
				if InfoGenerators then
					Print("№", gNum, "   curIndixes=", genIndexCombinations[j], " curGenTypes=", curGenTypes, "\n");
				fi;
					
				# Stop if first generatirs set found
				found := true;
				if StopIfFirstSetFound then 
					break;
				fi;
			fi;
			
		od;
		
		# Search status
		if found then
			Print("№", gNum, "  Found in n=", n, " variants ", Size(genSets), ", combinations ", scanCombs, " from ", Size(genIndexCombinations), ", past ", Runtime() - beginTime, " ms, total duration ", Runtime(), " ms\n");
		else
			Print("№", gNum, "  Failed in n=", n, " variants ", Size(genSets), ", combinations ", scanCombs, " from ", Size(genIndexCombinations), ", past ", Runtime() - beginTime, " ms, total duration ", Runtime(), " ms\n");
		fi;
	od;
	Print("№", gNum, " Duration ", Runtime() - CycleTime, " ms\n");
	
od;

Print("Total duration ", Runtime(), " ms\n");

LogTo();
