# Supplementary material for: How many symmetry operations are needed to generate a space group?
Source: publisher site journal article supplement (doi:10.1515/zkri-2024-0110), 2025-01-01
Supplement: Supplementary file 4 [file j_zkri-2024-0110_suppl_003.xlsx]

## Sheet: gVectors_2.9
SG No.	gen1			gen2			gen3			gen4			gen5			gen6
1	x + 1	y	z	x	y + 1	z	x	y	z + 1
2	x + 1	y	z	x	y + 1	z	x	y	z + 1	-x	-y	-z
3	x + 1	y	z	x	y + 1	z	x	y	z + 1	-x	y	-z
4	x + 1	y	z	x	y	z + 1	-x	y + 1/2	-z
5	x	y	z + 1	x + 1/2	y + 1/2	z	-x	y	-z
6	x + 1	y	z	x	y + 1	z	x	y	z + 1	x	-y	z
7	x + 1	y	z	x	y + 1	z	x	-y	z + 1/2
8	x	y	z + 1	x + 1/2	y + 1/2	z	x	-y	z
9	x + 1/2	y + 1/2	z	x	-y	z + 1/2
10	x + 1	y	z	x	y + 1	z	x	y	z + 1	-x	y	-z	-x	-y	-z
11	x + 1	y	z	x	y	z + 1	-x	-y	-z	-x	y + 1/2	-z
12	x	y	z + 1	x + 1/2	y + 1/2	z	-x	y	-z	-x	-y	-z
13	x + 1	y	z	x	y + 1	z	-x	-y	-z	-x	y	-z + 1/2
14	x + 1	y	z	-x	-y	-z	-x	y + 1/2	-z + 1/2
15	x + 1/2	y + 1/2	z	-x	-y	-z	-x	y	-z + 1/2
16	x + 1	y	z	x	y + 1	z	x	y	z + 1	-x	-y	z	-x	y	-z
17	x + 1	y	z	x	y + 1	z	x	-y	-z	-x	-y	z + 1/2
18	x	y	z + 1	-x	-y	z	-x + 1/2	y + 1/2	-z
19	-x + 1/2	-y	z + 1/2	-x	y + 1/2	-z + 1/2
20	x + 1/2	y + 1/2	z	x	-y	-z	-x	-y	z + 1/2
21	x	y	z + 1	x + 1/2	y + 1/2	z	-x	-y	z	-x	y	-z
22	x	y + 1/2	z + 1/2	x + 1/2	y	z + 1/2	-x	-y	z	-x	y	-z
23	x + 1/2	y + 1/2	z + 1/2	-x	-y	z	-x	y	-z
24	x + 1/2	y + 1/2	z + 1/2	-x + 1/2	-y	z + 1/2	-x	y + 1/2	-z + 1/2
25	x + 1	y	z	x	y + 1	z	x	y	z + 1	-x	-y	z	x	-y	z
26	x + 1	y	z	x	y + 1	z	-x	y	z	-x	-y	z + 1/2
27	x + 1	y	z	x	y + 1	z	-x	-y	z	x	-y	z + 1/2
28	x	y + 1	z	x	y	z + 1	-x	-y	z	x + 1/2	-y	z
29	x	y + 1	z	-x	-y	z + 1/2	x + 1/2	-y	z
30	x + 1	y	z	-x	-y	z	x	-y + 1/2	z + 1/2
31	x	y + 1	z	-x	y	z	-x + 1/2	-y	z + 1/2
32	x	y	z + 1	-x	-y	z	x + 1/2	-y + 1/2	z
33	-x	-y	z + 1/2	x + 1/2	-y + 1/2	z
34	x + 1	y	z	-x	-y	z	x + 1/2	-y + 1/2	z + 1/2
35	x	y	z + 1	x + 1/2	y + 1/2	z	-x	-y	z	x	-y	z
36	x + 1/2	y + 1/2	z	-x	y	z	-x	-y	z + 1/2
37	x + 1/2	y + 1/2	z	-x	-y	z	x	-y	z + 1/2
38	x + 1	y	z	x	y + 1/2	z + 1/2	-x	-y	z	x	-y	z
39	x + 1	y	z	x	y + 1/2	z + 1/2	-x	-y	z	x	-y + 1/2	z
40	x	y + 1/2	z + 1/2	-x	-y	z	x + 1/2	-y	z
41	x	y + 1/2	z + 1/2	-x	-y	z	x + 1/2	-y + 1/2	z
42	x	y + 1/2	z + 1/2	x + 1/2	y	z + 1/2	-x	-y	z	x	-y	z
43	-x	-y	z	x + 1/4	-y + 1/4	z + 1/4
44	x + 1/2	y + 1/2	z + 1/2	-x	-y	z	x	-y	z
45	x + 1/2	y + 1/2	z + 1/2	-x	-y	z	x + 1/2	-y + 1/2	z
46	x + 1/2	y + 1/2	z + 1/2	-x	-y	z	x + 1/2	-y	z
47	x + 1	y	z	x	y + 1	z	x	y	z + 1	-x	-y	z	-x	y	-z	-x	-y	-z
48	x + 1	y	z	-x	-y	-z	-x + 1/2	-y + 1/2	z	-x + 1/2	y	-z + 1/2
49	x + 1	y	z	x	y + 1	z	-x	-y	z	-x	-y	-z	-x	y	-z + 1/2
50	x	y	z + 1	-x	-y	-z	-x + 1/2	-y + 1/2	z	-x + 1/2	y	-z
51	x	y + 1	z	x	y	z + 1	-x	y	-z	-x	-y	-z	-x + 1/2	-y	z
52	-x	-y	-z	-x + 1/2	-y	z	-x + 1/2	y + 1/2	-z + 1/2
53	x	y + 1	z	x	-y	-z	-x	-y	-z	-x + 1/2	-y	z + 1/2
54	x	y + 1	z	-x	-y	-z	-x + 1/2	-y	z	-x	y	-z + 1/2
55	x	y	z + 1	-x	-y	z	-x	-y	-z	-x + 1/2	y + 1/2	-z
56	-x	-y	-z	-x + 1/2	-y + 1/2	z	-x	y + 1/2	-z + 1/2
57	x + 1	y	z	-x	-y	-z	-x	-y	z + 1/2	-x	y + 1/2	-z + 1/2
58	-x	-y	z	-x	-y	-z	-x + 1/2	y + 1/2	-z + 1/2
59	x	y	z + 1	-x	-y	-z	-x + 1/2	-y + 1/2	z	-x	y + 1/2	-z
60	-x	-y	-z	-x + 1/2	-y + 1/2	z + 1/2	-x	y	-z + 1/2
61	-x	-y	-z	-x + 1/2	-y	z + 1/2	-x	y + 1/2	-z + 1/2
62	-x	-y	-z	-x + 1/2	-y	z + 1/2	-x	y + 1/2	-z
63	x + 1/2	y + 1/2	z	x	-y	-z	-x	-y	-z	-x	-y	z + 1/2
64	x + 1/2	y + 1/2	z	x	-y	-z	-x	-y	-z	-x	-y + 1/2	z + 1/2
65	x	y	z + 1	x + 1/2	y + 1/2	z	-x	-y	z	-x	y	-z	-x	-y	-z
66	x + 1/2	y + 1/2	z	-x	-y	z	-x	-y	-z	-x	y	-z + 1/2
67	x	y	z + 1	x + 1/2	y + 1/2	z	x	-y	-z	-x	-y	-z	-x	-y + 1/2	z
68	x + 1/2	y + 1/2	z	-x	-y	-z	-x + 1/2	-y	z	-x	y	-z + 1/2
69	x	y + 1/2	z + 1/2	x + 1/2	y	z + 1/2	-x	-y	z	-x	y	-z	-x	-y	-z
70	-x	-y	-z	x + 1/4	y + 1/4	-z	x + 1/4	-y	z + 1/4
71	x + 1/2	y + 1/2	z + 1/2	-x	-y	z	-x	y	-z	-x	-y	-z
72	x + 1/2	y + 1/2	z + 1/2	-x	-y	z	-x	-y	-z	-x + 1/2	y + 1/2	-z
73	x + 1/2	y + 1/2	z + 1/2	-x	-y	-z	-x + 1/2	-y	z + 1/2	-x	y + 1/2	-z + 1/2
74	x + 1/2	y + 1/2	z + 1/2	x	-y	-z	-x	-y	-z	-x	-y + 1/2	z
75	x + 1	y	z	x	y	z + 1	-y	x	z
76	x + 1	y	z	-y	x	z + 1/4
77	x + 1	y	z	x	y	z + 1	-y	x	z + 1/2
78	x + 1	y	z	y	-x	z + 1/4
79	x + 1/2	y + 1/2	z + 1/2	-y	x	z
80	x + 1/2	y + 1/2	z + 1/2	-y + 1/2	x	z + 3/4
81	x + 1	y	z	x	y	z + 1	y	-x	-z
82	x + 1/2	y + 1/2	z + 1/2	y	-x	-z
83	x + 1	y	z	x	y	z + 1	-y	x	z	-x	-y	-z
84	x + 1	y	z	-x	-y	-z	-y	x	z + 1/2
85	x	y	z + 1	-x	-y	-z	-y + 1/2	x	z
86	x + 1	y	z	-x	-y	-z	-y	x + 1/2	z + 1/2
87	x + 1/2	y + 1/2	z + 1/2	-y	x	z	-x	-y	-z
88	-x	-y	-z	-y + 1/4	x + 1/4	-z + 1/4
89	x + 1	y	z	x	y	z + 1	-y	x	z	-x	y	-z
90	x	y	z + 1	y	x	-z	-y + 1/2	x + 1/2	z
91	x + 1	y	z	-x	y	-z	-y	x	z + 1/4
92	y	x	-z	-y + 1/2	x + 1/2	z + 1/4
93	x + 1	y	z	x	y	z + 1	-x	y	-z	-y	x	z + 1/2
94	x	y	z + 1	y	x	-z	-y + 1/2	x + 1/2	z + 1/2
95	x + 1	y	z	-x	y	-z	y	-x	z + 1/4
96	y	x	-z	y + 1/2	-x + 1/2	z + 1/4
97	x + 1/2	y + 1/2	z + 1/2	-y	x	z	-x	y	-z
98	x + 1/2	y + 1/2	z + 1/2	-y	-x	-z	-y + 1/2	x	z + 3/4
99	x + 1	y	z	x	y	z + 1	-y	x	z	x	-y	z
100	x	y	z + 1	-y	x	z	x + 1/2	-y + 1/2	z
101	x + 1	y	z	-y	-x	z	-y	x	z + 1/2
102	x + 1	y	z	-y	-x	z	-y + 1/2	x + 1/2	z + 1/2
103	x + 1	y	z	-y	x	z	x	-y	z + 1/2
104	-y	x	z	x + 1/2	-y + 1/2	z + 1/2
105	x + 1	y	z	x	-y	z	-y	x	z + 1/2
106	-y	x	z + 1/2	x + 1/2	-y + 1/2	z
107	x + 1/2	y + 1/2	z + 1/2	-y	x	z	x	-y	z
108	x + 1/2	y + 1/2	z + 1/2	-y	x	z	x	-y	z + 1/2
109	x	-y	z	-y	x + 1/2	z + 1/4
110	-y + 1/2	x	z + 3/4	x	-y	z + 1/2
111	x + 1	y	z	x	y	z + 1	y	-x	-z	-x	y	-z
112	x + 1	y	z	y	-x	-z	-x	y	-z + 1/2
113	x	y	z + 1	y	-x	-z	-x + 1/2	y + 1/2	-z
114	y	-x	-z	-x + 1/2	y + 1/2	-z + 1/2
115	x + 1	y	z	x	y	z + 1	y	-x	-z	x	-y	z
116	x + 1	y	z	y	-x	-z	x	-y	z + 1/2
117	x	y	z + 1	y	-x	-z	x + 1/2	-y + 1/2	z
118	x + 1	y	z	y	-x	-z	x + 1/2	-y + 1/2	z + 1/2
119	x + 1/2	y + 1/2	z + 1/2	y	-x	-z	x	-y	z
120	x + 1/2	y + 1/2	z + 1/2	y	-x	-z	x	-y	z + 1/2
121	x + 1/2	y + 1/2	z + 1/2	y	-x	-z	-x	y	-z
122	y	-x	-z	-x	y + 1/2	-z + 1/4
123	x + 1	y	z	x	y	z + 1	-y	x	z	-x	y	-z	-x	-y	-z
124	x + 1	y	z	-y	x	z	-x	-y	-z	-x	y	-z + 1/2
125	x	y	z + 1	y	x	-z	-x	-y	-z	-y + 1/2	x	z
126	-x	-y	-z	-y + 1/2	x	z	-x + 1/2	y	-z + 1/2
127	x	y	z + 1	-y	x	z	-x	-y	-z	-x + 1/2	y + 1/2	-z
128	-y	x	z	-x	-y	-z	-x + 1/2	y + 1/2	-z + 1/2
129	x	y	z + 1	-y	-x	-z	-x	-y	-z	-y + 1/2	x	z
130	-x	-y	-z	-y + 1/2	x	z	-x	y + 1/2	-z + 1/2
131	x + 1	y	z	-x	y	-z	-x	-y	-z	-y	x	z + 1/2
132	x + 1	y	z	y	x	-z	-x	-y	-z	-y	x	z + 1/2
133	-x	-y	-z	-y + 1/2	x	z + 1/2	-x + 1/2	y	-z
134	x + 1	y	z	y	x	-z	-x	-y	-z	-y + 1/2	x	z + 1/2
135	-x	-y	-z	-y	x	z + 1/2	-x + 1/2	y + 1/2	-z
136	y	x	-z	-x	-y	-z	-y + 1/2	x + 1/2	z + 1/2
137	-x	-y	-z	-y + 1/2	x	z + 1/2	-x	y + 1/2	-z
138	-y	-x	-z	-x	-y	-z	-y + 1/2	x	z + 1/2
139	x + 1/2	y + 1/2	z + 1/2	-y	x	z	-x	y	-z	-x	-y	-z
140	x + 1/2	y + 1/2	z + 1/2	-y	x	z	-x	-y	-z	-x	y	-z + 1/2
141	x	-y	-z	-x	-y	-z	-y + 1/4	x + 3/4	z + 1/4
142	-x	-y	-z	-y + 1/4	x + 3/4	z + 1/4	-x + 1/2	y	-z
143	x + 1	y	z	x	y	z + 1	-y	x - y	z
144	x + 1	y	z	-y	x - y	z + 1/3
145	x + 1	y	z	-x + y	-x	z + 1/3
146	x + 2/3	y + 1/3	z + 1/3	-y	x - y	z
147	x + 1	y	z	x	y	z + 1	y	-x + y	-z
148	x + 2/3	y + 1/3	z + 1/3	y	-x + y	-z
149	x + 1	y	z	x	y	z + 1	-y	x - y	z	-y	-x	-z
150	x	y	z + 1	-y	x - y	z	y + 1	x	-z
151	x + 1	y	z	x	x - y	-z	-y	x - y	z + 1/3
152	-y	x - y	z + 1/3	y + 1	x	-z
153	x + 1	y	z	x	x - y	-z	-x + y	-x	z + 1/3
154	-x + y	-x	z + 1/3	y + 1	x	-z
155	x + 2/3	y + 1/3	z + 1/3	-y	x - y	z	y	x	-z
156	x + 1	y	z	-y	-x	z	-y	x - y	z + 1
157	y + 1	x	z	-y	x - y	z + 1
158	x + 1	y	z	-y	x - y	z	-y	-x	z + 1/2
159	y	x	z + 1/2	-y + 1	x - y	z
160	-y	-x	z	-x + y + 2/3	-x + 1/3	z + 1/3
161	-y	x - y	z	-y + 1/3	-x + 2/3	z + 1/6
162	x	y	z + 1	-y	-x	-z	y + 1	-x + y	-z
163	x + 1	y	z	y	-x + y	-z	-y	-x	-z + 1/2
164	x	y	z + 1	y	-x + y	-z	y + 1	x	-z
165	-y	-x	z + 1/2	y + 1	-x + y	-z
166	x	y	z + 1	y	x	-z	x - y + 2/3	x + 1/3	-z + 1/3
167	y	-x + y	-z	y + 1/3	x + 2/3	-z + 1/6
168	y + 1	-x + y	z	y	-x + y	z + 1
169	x + 1	y	z	x - y	x	z + 1/6
170	x + 1	y	z	y	-x + y	z + 1/6
171	x - y	x	z + 1/3	-x + 1	-y	z
172	y	-x + y	z + 1/3	-x + 1	-y	z
173	y	-x + y	z + 1/2	-y + 1	x - y	z
174	x + 1	y	-z	-y	x - y	z + 1
175	x	y	z + 1	y	-x + y	z	-x + 1	-y	-z
176	y	-x + y	z + 1/2	-x + 1	-y	-z
177	x	y	z + 1	y	-x + y	z	y + 1	x	-z
178	x - y	x	z + 1/6	x - y + 1	-y	-z
179	y	-x + y	z + 1/6	x - y + 1	-y	-z
180	x	y	z + 1	y	-x + y	z + 2/3	x - y + 1	-y	-z
181	x	y	z + 1	y	-x + y	z + 1/3	x - y + 1	-y	-z
182	x	y	z + 1	y	-x + y	z + 1/2	y + 1	x	-z
183	x	y	z + 1	y	-x + y	z	-y + 1	-x	z
184	-y	-x	z + 1/2	y + 1	-x + y	z
185	y	-x + y	z + 1/2	y + 1	x	z
186	y	-x + y	z + 1/2	-y + 1	-x	z
187	-y	x - y	-z	-y + 1	-x	z	-y	-x	z + 1
188	x + 1	y	z	-y	-x	-z	-y	x - y	-z + 1/2
189	x	y	z + 1	-y	x - y	-z	y + 1	x	-z
190	-y	x - y	-z + 1/2	y + 1	x	-z
191	x	y	z + 1	-x	-y	z	y	x	-z	y + 1	-x + y	-z
192	-x	-y	z	y	x	-z + 1/2	y + 1	-x + y	-z
193	-y	-x	-z	-x	-y	z + 1/2	y + 1	-x + y	-z
194	y	x	-z	-x	-y	z + 1/2	y + 1	-x + y	-z
195	x + 1	y	z	-x	-y	z	z	x	y
196	x	y + 1/2	z + 1/2	-x	-y	z	z	x	y
197	-x	-y	z	z + 1/2	x + 1/2	y + 1/2
198	z	x	y	-x + 1/2	-y	z + 1/2
199	z	x	y	-x + 1/2	y	-z
200	x + 1	y	z	-x	-y	z	-z	-x	-y
201	x + 1/2	y + 1/2	-z	z + 1	x	y
202	x	y + 1/2	z + 1/2	-x	-y	z	-z	-x	-y
203	z	x	y	x + 1/4	y + 1/4	-z
204	x	y	-z	z + 1/2	-x + 1/2	-y + 1/2
205	z	x	y	x + 1/2	y	-z + 1/2
206	-z	-x	-y	-x + 1/2	y	-z
207	y	-x	z	z + 1	x	y
208	y + 1/2	x + 1/2	-z + 1/2	z + 1	x	y
209	z	x	y	y	x + 1/2	-z + 1/2
210	z	x	y	y + 1/4	x + 1/4	-z + 1/4
211	y	x	-z	z + 1/2	x + 1/2	y + 1/2
212	z	x	y	y + 1/4	x + 3/4	-z + 3/4
213	z	x	y	y + 3/4	x + 1/4	-z + 1/4
214	y + 3/4	x + 1/4	-z + 1/4	z + 1/2	x + 1/2	y + 1/2
215	y	-x	-z	z + 1	x	y
216	z	x	y	-y	-x + 1/2	z + 1/2
217	y	x	z	z + 1/2	-x + 1/2	-y + 1/2
218	z	x	y	-y + 1/2	-x + 1/2	z + 1/2
219	z	x	y	-y + 1/2	-x	z
220	z	x	y	-y + 1/4	-x + 3/4	z + 3/4
221	x + 1	y	z	y	x	-z	-z	-x	-y
222	-z	-x	-y	y	x	-z + 1/2
223	-z	-x	-y	y + 1/2	x + 1/2	-z + 1/2
224	x + 1	y	z	-y	-x	-z	-z	x + 1/2	y + 1/2
225	y	-x	z	-z	-x + 1/2	-y + 1/2
226	-z	-x	-y	y + 1/2	x	-z
227	-y	-x	-z	-z + 1/2	x + 1/4	y + 3/4
228	-z	-x	-y	y + 3/4	x + 1/4	-z
229	x + 1/2	y + 1/2	z + 1/2	y	x	-z	-z	-x	-y
230	-z	-x	-y	y + 3/4	x + 1/4	-z + 1/4
